# Supplementary material
Source: publisher figshare collection journal article supplement (https://karger.figshare.com/articles/dataset/_/15261876)

**a**

Egger's publication bias plot

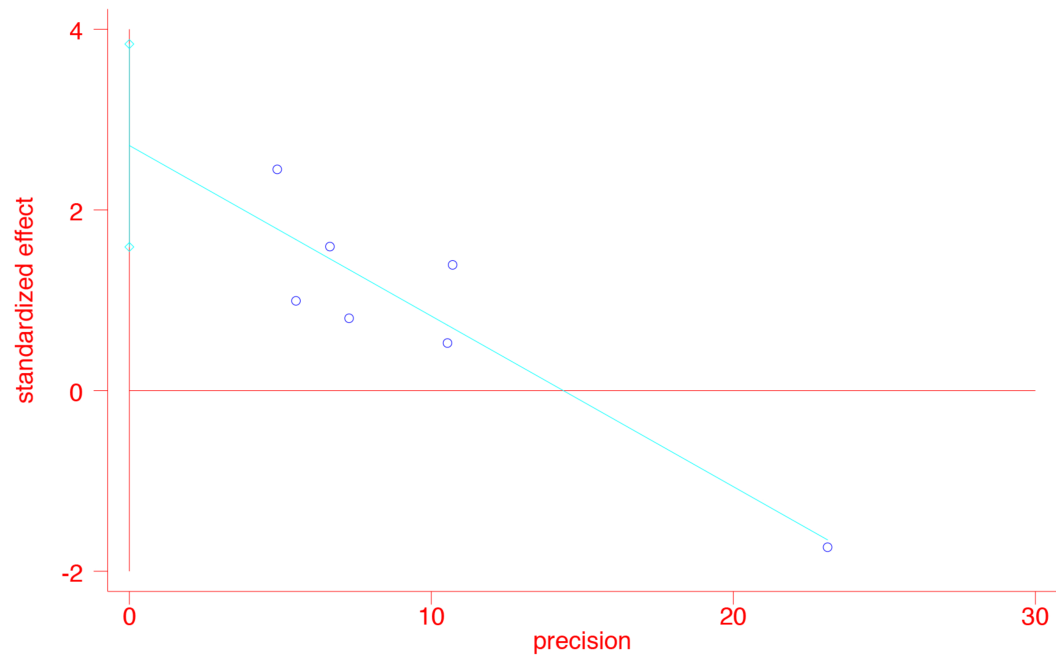**b**

Egger's publication bias plot

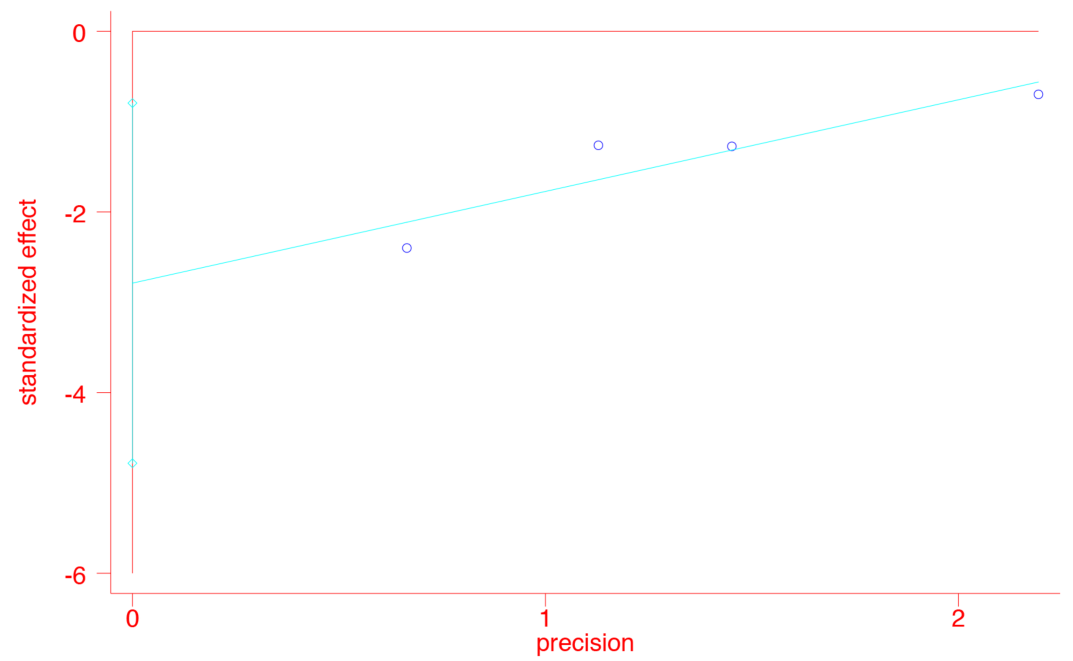

Supplement: Supplementary file 1 [file 1]

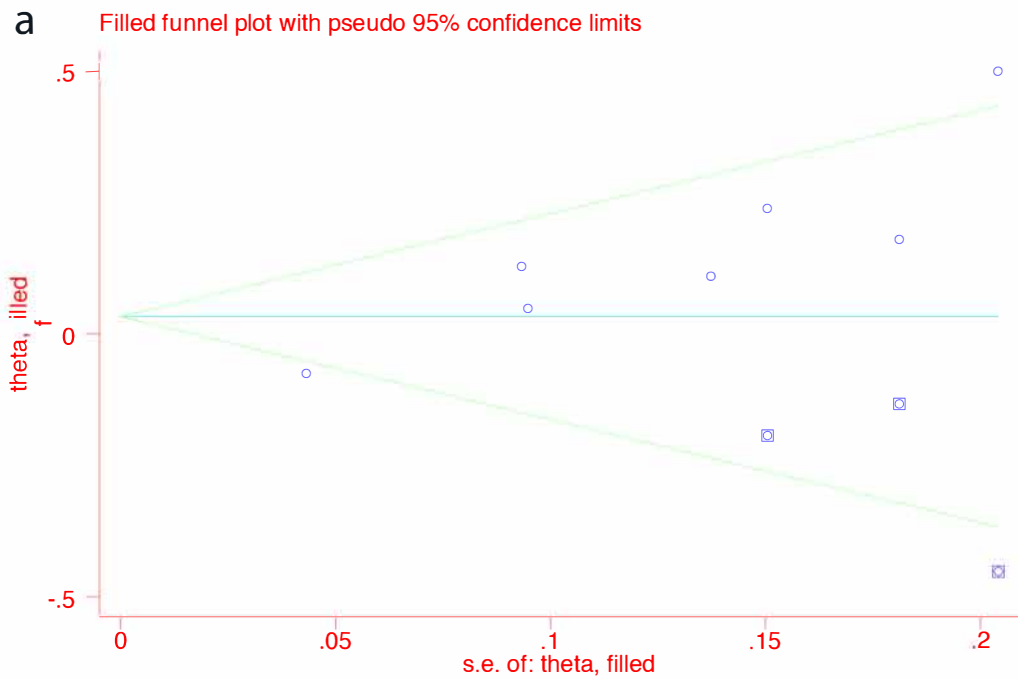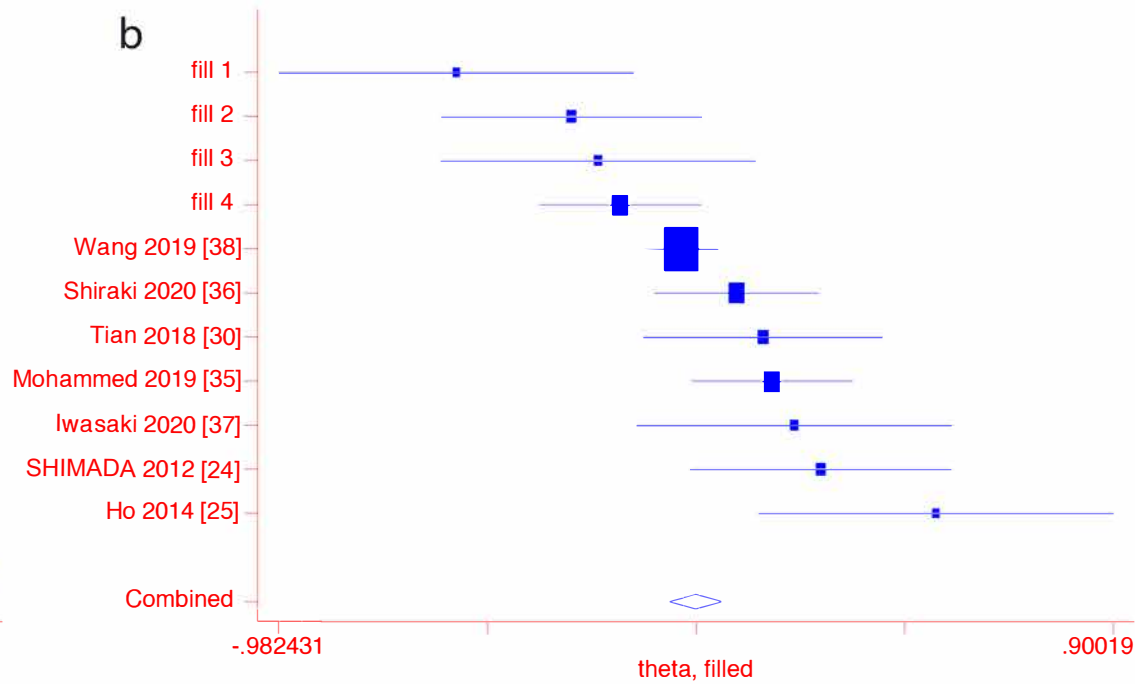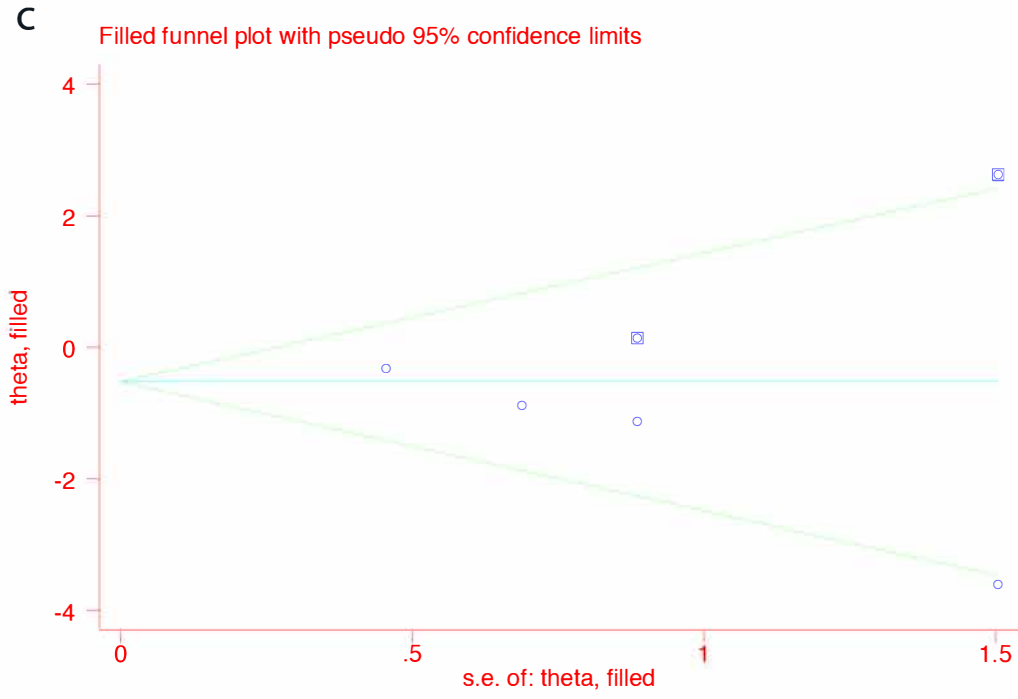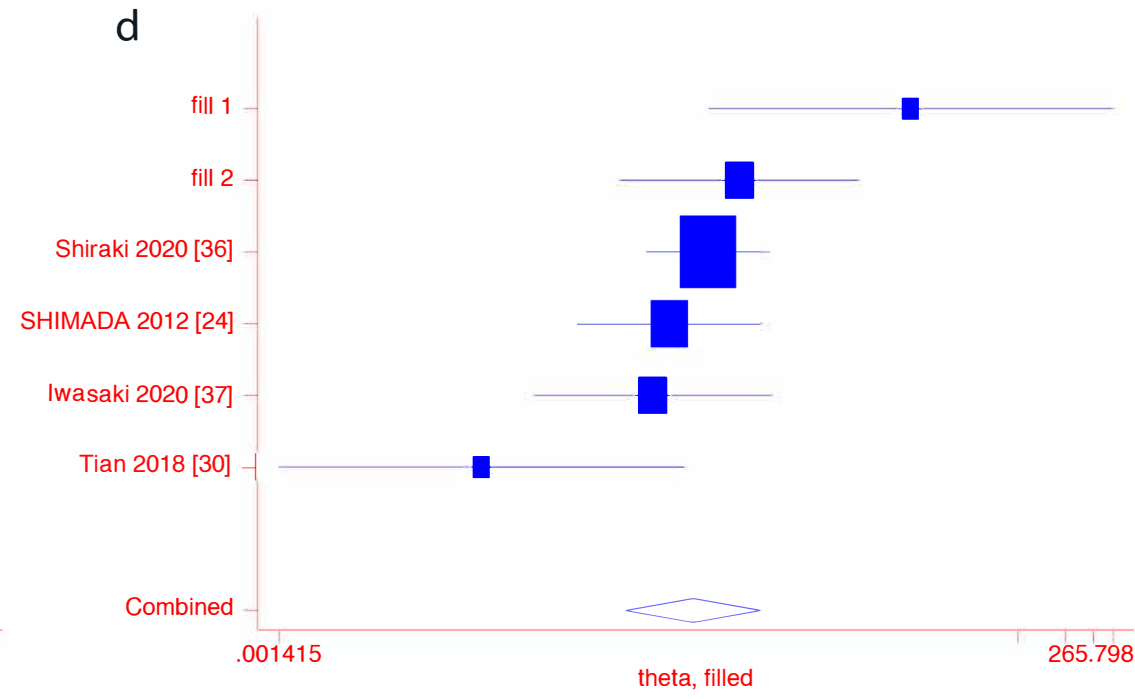

Supplement: Supplementary file 2 [file 1]

a

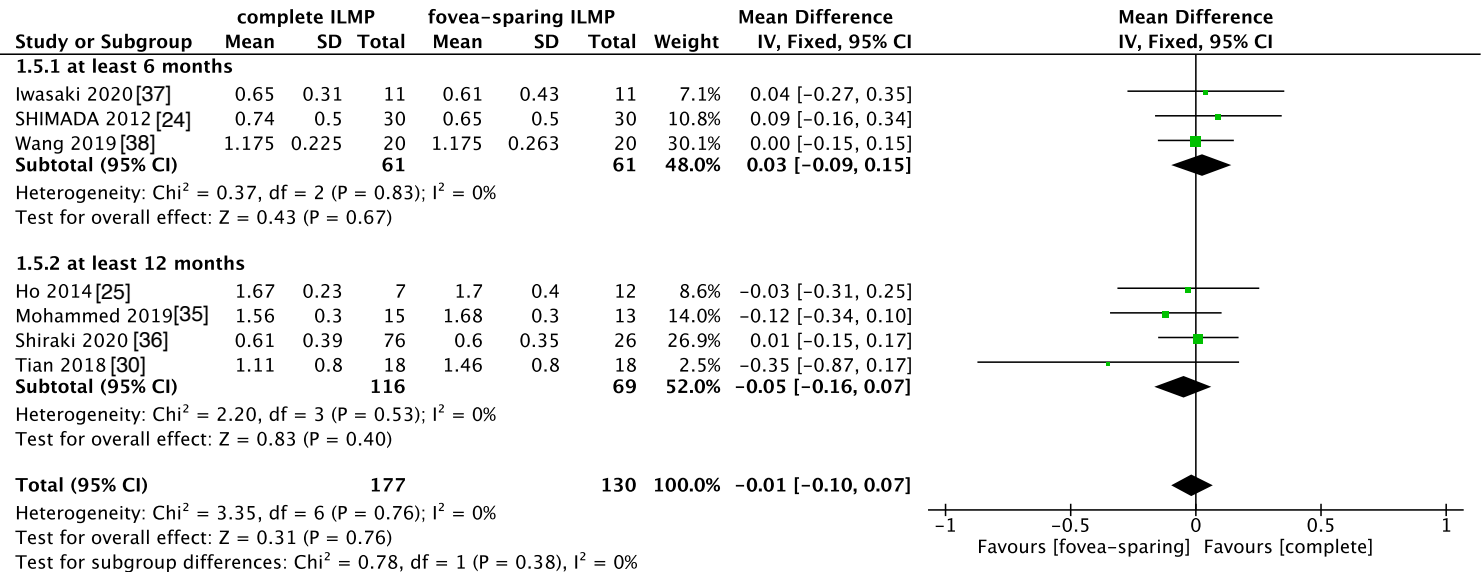

b

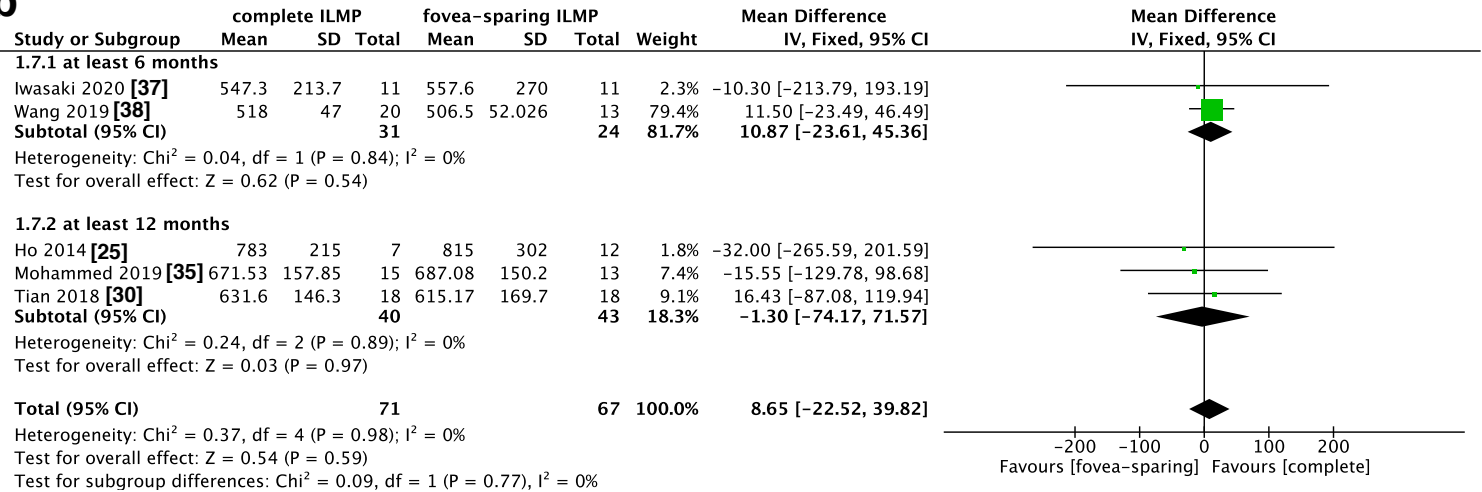

Supplement: Supplementary file 3 [file 1]

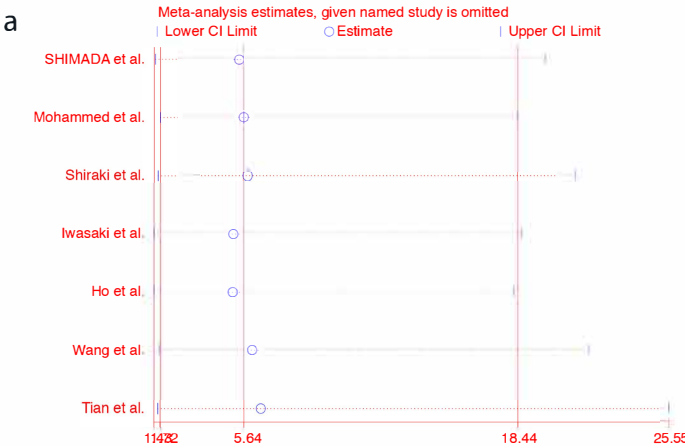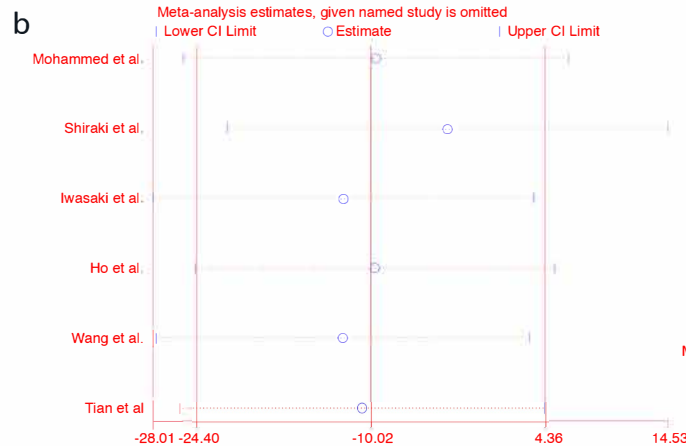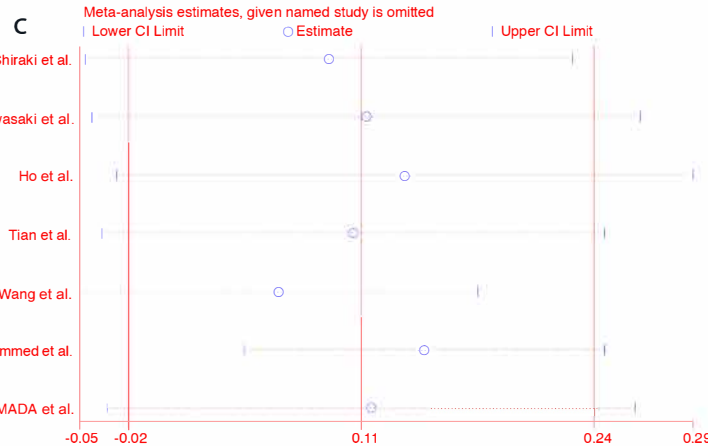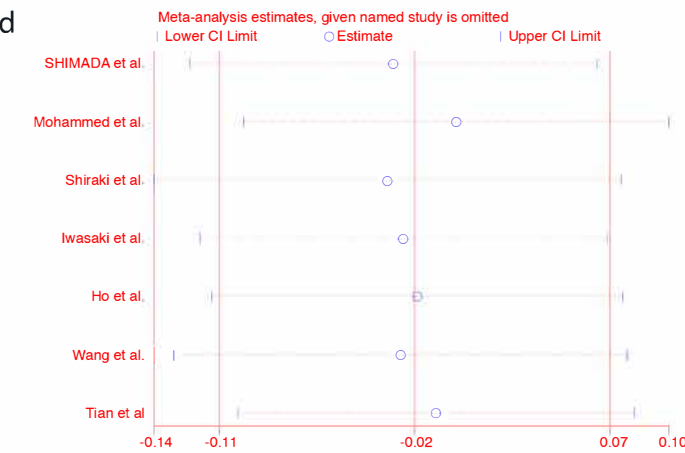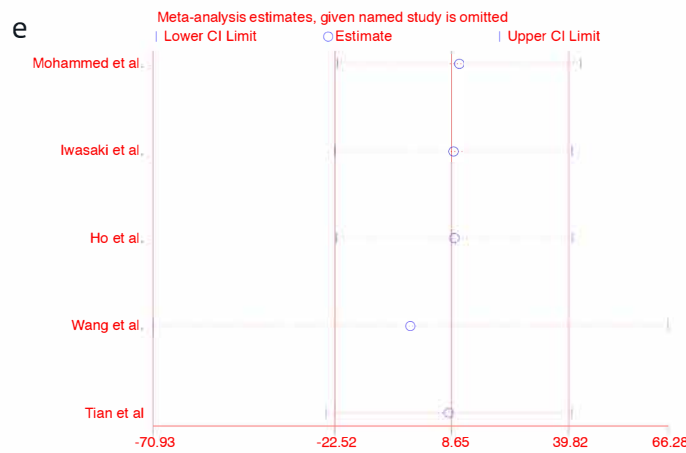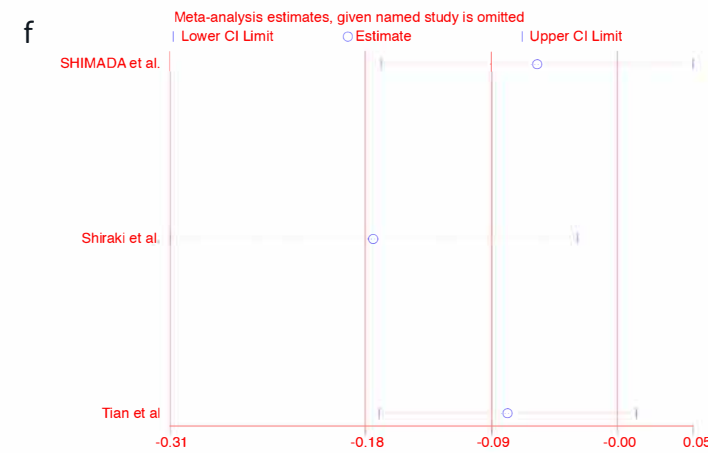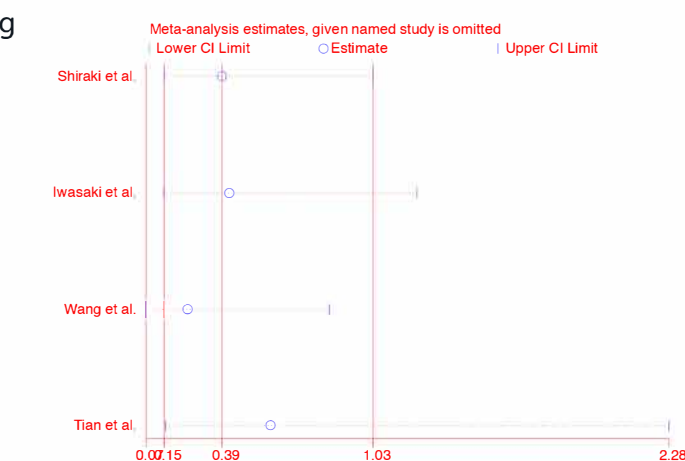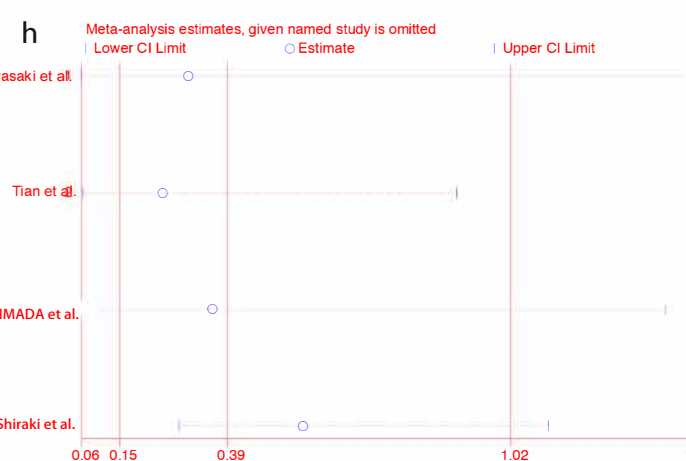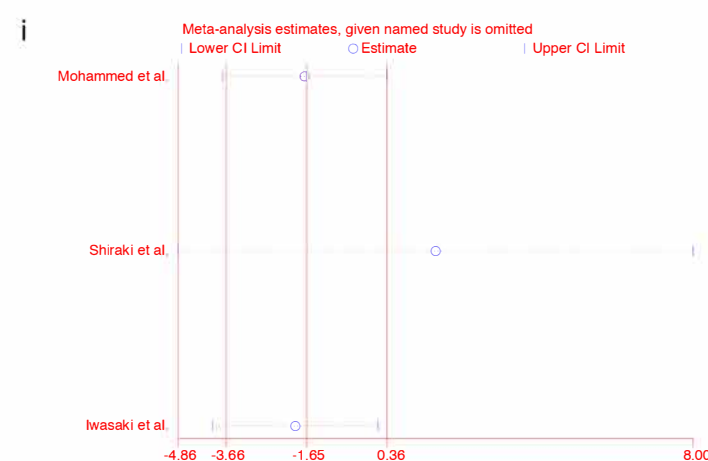

Supplement: Supplementary file 4 [file 1]
